# Supplementary material for: Individuals with depressive tendencies experience difficulty in forgetting negative material: two mechanisms revealed by ERP data in the directed forgetting paradigm
Source: PubMed Central journal article supplement (PMC5773552; doi:10.1038/s41598-018-19570-0), 2018-01-18
Supplement: 41598_2018_19570_MOESM1_ESM.pdf [file 41598_2018_19570_MOESM1_ESM.pdf]

Individuals with depressive tendencies experience difficulty in forgetting negative material: two mechanisms revealed by ERP data in the directed forgetting paradigm

Hui Xie<sup>#</sup>, Donghong Jiang<sup>#</sup>, Dandan Zhang<sup>\*</sup>

Institute of Affective and Social Neuroscience, Shenzhen University, Shenzhen 518060, China  
Shenzhen Key Laboratory of Affective and Social Cognitive Science, Shenzhen University, Shenzhen 518060, China

\* Corresponding author. Room 412, Building of Normal School, Shenzhen University, 3688 Nanhai Ave, Nanshan District, Shenzhen 518060, P.R. China . Tel/Fax: 86-755-26421385.  
E-mail: zhangdd05@gmail.com

# Both authors contributed equally to the study.

Running title: Forgetting negative material in depression

# Additional results

## Behavioral data

### *Recognition rate*

The interaction of instruction by emotion was significant ( $F(1,58) = 8.65, p = 0.005, \eta_p^2 = 0.130$ ). Compared with the instruction of forgetting neutral words ( $74.6 \pm 1.0\%$ ), the instruction of forgetting negative words resulted a larger recognition rate ( $78.4 \pm 1.0\%$ ;  $F(1,58) = 19.2, p < 0.001$ ). However, this emotion difference did not achieve significant level when participants were instructed to remember previously presented words ( $F(1,58) < 1$ ; negative =  $82.9 \pm 1.3\%$ , neutral =  $83.2 \pm 1.6\%$ ).

### *Reaction time*

The interaction of instruction by emotion was significant ( $F(1,58) = 7.10, p = 0.010, \eta_p^2 = 0.109$ ). Compared with the condition of remembering neutral words ( $751 \pm 14.8$  ms), the condition of remembering negative words was associated with a shorter RT ( $725 \pm 12.1$  ms) ( $F(1,58) = 7.39, p = 0.009$ ). However, the emotion difference did not achieve significant level when participants were instructed to forget previously presented words ( $F(1,58) < 1$ ; negative =  $739 \pm 16.6$  ms, neutral =  $731 \pm 18.6$  ms).

## ERPs

### *Cue-occipital P1*

The interaction of emotion by group was significant ( $F(1,58) = 5.96, p = 0.018, \eta_p^2 = 0.093$ ). Compared with subjects without depressive tendencies ( $0.76 \pm 0.20$   $\mu$ V), subjects with depressive tendencies had larger P1 amplitudes ( $1.55 \pm 0.20$   $\mu$ V) in negative-word trials ( $F(1,58) = 7.75, p = 0.007$ ). However, this group difference did not achieve significant level in neutral-word trials ( $F(1,58) < 1$ ; nondepressed =  $0.63 \pm 0.20$   $\mu$ V, depressed =  $0.70 \pm 0.20$   $\mu$ V).

### *Cue-frontal N2*

The interaction of emotion by group was significant ( $F(1,58) = 4.73, p = 0.034, \eta_p^2 = 0.075$ ). Compared with subjects without depressive tendencies ( $3.41 \pm 0.24$   $\mu$ V), subjects with depressive tendencies had larger negative-going N2 amplitudes ( $2.53 \pm 0.24$   $\mu$ V) in negative-word trials ( $F(1,58) = 7.00, p = 0.010$ ). However, this group difference did not achieve significant level in neutral-word trials ( $F(1,58) < 1$ ; nondepressed =  $3.55 \pm 0.22$   $\mu$ V, depressed =  $3.27 \pm 0.22$   $\mu$ V).

The interaction of instruction by emotion was significant ( $F(1,58) = 9.61, p = 0.003, \eta_p^2 = 0.142$ ). Compared with the instruction of forgetting previous neutral words ( $3.05 \pm 0.21$   $\mu$ V), the instruction of forgetting previous negative words evoked larger negative-going N2 amplitudes ( $2.15 \pm 0.19$   $\mu$ V;  $F(1,58) = 18.8, p < 0.001$ ). However, this emotion difference did not achieve significant level when participants were instructed to remember previously presented words ( $F(1,58) < 1$ ; negative =  $3.79 \pm 0.20$   $\mu$ V, neutral =  $3.78 \pm 0.19$   $\mu$ V).

### *Cue-parietal P3*

The interaction of instruction by emotion was significant ( $F(1,58) = 23.7, p < 0.001, \eta_p^2 = 0.290$ ). Compared with the instruction of remembering neutral words ( $5.16 \pm 0.26 \mu\text{V}$ ), the instruction of remembering negative words evoked larger P3 amplitudes ( $6.77 \pm 0.24 \mu\text{V}; F(1,58) = 43.1, p < 0.001$ ). However, this emotion difference did not achieve significant level when participants were instructed to forget previously presented words ( $F(1,58) < 1$ ; negative =  $3.22 \pm 0.22 \mu\text{V}$ , neutral =  $3.16 \pm 0.27 \mu\text{V}$ ).
